# Supplementary material for: Serum miR-15a-5p may predict recurrence of atrial fibrillation after catheter ablation: a single center retrospective study
Source: PeerJ journal article supplement (doi:10.7717/peerj.19618), 2025-07-03
Supplement: RawData.xlsx [file RawData.xlsx]

## Sheet: baseline characteristics
Serial number	Group type 1		Group type 2	Group type 3		gender	age	hemoglobin	白leukocyte细胞	platelet	CRP	creatinine	ALT	CkMB	hypertension	CHD	diabetes mellitus	uric acid	total cholesterol	triglyceride	HDL	LDL	LAD	LVEF
NO.1	Control group		Control group	Control group		F	56	118	4.52	231	0.4	57.9	14	3	No	No	No	272	4.79	1.1	1.26	3.13	32	74
NO.2	Control group		Control group	Control group		M	63	147	3.65	125	0.4	89.6	33	7	Yes	No	No	625	4.57	1.8	1.1	2.89	39	72
NO.3	Control group		Control group	Control group		F	48	126	7.25	211	0.4	61	12	8	No	No	No	333	4.31	0.77	1.52	2.42	34	69
NO.4	Control group		Control group	Control group		M	41	4.91	5.7	140	3.6	81	31	10	No	No	No	368	4.33	2.11	0.9	2.84	32	67
NO.5	Control group		Control group	Control group		M	68	143	6.93	226	0.4	79.4	23	6	No	No	No	504	3.67	2.09	0.96	2.26	31	71
NO.6	Control group		Control group	Control group		M	52	149	5.61	316	0.96	70.1	13	8	No	No	No	310	4.22	0.87	1.23	2.54	34	69
NO.7	Control group		Control group	Control group		M	72	146	4.01	217	4.67	72.8	12	12	Yes	No	Yes	323	4.5	0.72	1.28	2.84	38	68
NO.8	Control group		Control group	Control group		M	71	147	7.68	270	3.1	70.1	24	17	Yes	No	Yes	267	3.69	0.66	1.24	2.19	39	68
NO.9	Control group		Control group	Control group		F	54	108	3.67	115	3.2	44.2	22	9	Yes	No	No	374	4.68	2.29	1.03	2.99	38	69
NO.10	Control group		Control group	Control group		M	50	143	7.74	183	0.67	71.3	15	8	Yes	No	No	339	4.76	1.86	1.14	2.95	37	73
NO.11	Control group		Control group	Control group		F	57	116	2.23	85	0.54	53.9	14	11	No	No	No	216	3.69	0.64	1.4	2.17	34	66
NO.12	Control group		Control group	Control group		F	47	122	5.43	168	0.4	59	13	7	No	No	No	261	5.07	1.74	1.53	2.92	37	68
NO.13	Control group		Control group	Control group		M	62	151	5.32	161	3.39	95.8	45	6	Yes	No	No	310	3.21	1.08	1.33	1.67	39	69
NO.14	Control group		Control group	Control group		M	55	151	5.32	161	3.39	95.8	45	6	Yes	No	No	172	4.05	0.78	1.35	2.46	38	66
NO.15	Control group		Control group	Control group		F	57	128	4.17	168	2.39	44.1	24	7	No	No	No	281	5.83	1.12	1.38	3.89	35	71
NO.16	Control group		Control group	Control group		F	50	128	4.37	151	0.4	55.4	14	4	No	No	No	235	5.44	2.56	1.04	3.72	31	68
NO.17	Control group		Control group	Control group		F	42	125	9.87	118	0.4	49.8	20	7	No	No	No	230	4.71	0.49	1.22	2.03	34	72
NO.18	Control group		Control group	Control group		M	66	139	4.66	127	1.64	82	17	11	No	No	Yes	360	4.7	2.06	0.89	3.14	35	68
NO.19	Control group		Control group	Control group		M	47	143	5.77	269	0.4	65.5	14	8	No	No	No	386	5.89	1.39	1.02	4.17	33	70
NO.20	Control group		Control group	Control group		M	47	128	3.66	117	0.4	74.7	33	7	Yes	No	No	394	3.87	1.14	1	2.65	39	73
NO.21	AF group		non-recurrent group	paroxysmal AF		F	78	122	5.27	131	1.47	68.7	9	7	Yes	No	Yes	508	4.48	1.26	1.02	2.76	44	63
NO.22	AF group		non-recurrent group	paroxysmal AF		M	54	149	6.34	155	0.4	100.8	22	7	Yes	No	No	511	4.05	1.72	0.83	2.58	44	67
NO.23	AF group		non-recurrent group	persistent AF		M	53	158	7.5	164	2.56	78.1	28	16	No	No	Yes	319	4.37	1.93	1.15	2.41	50	62
NO.24	AF group		non-recurrent group	persistent AF		F	66	116	3.97	111	0.65	82	20	10	No	Yes	No	390	2.73	0.38	1.46	1.28	45	54
NO.25	AF group		non-recurrent group	paroxysmal AF		F	75	131	5.82	167	4.41	60.8	8	10	No	No	No	350	5.19	0.58	1.73	3.28	45	69
NO.26	AF group		non-recurrent group	paroxysmal AF		F	80	134	6.57	272	3.08	72.3	26	10	No	No	No	317	5.19	1.7	1.2	2.98	52	73
NO.27	AF group		non-recurrent group	paroxysmal AF		M	47	134	3.77	107	33.7	135.1	36	17	Yes	No	No	420	2.36	1	0.61	1.53	51	56
NO.28	AF group		non-recurrent group	paroxysmal AF		M	56	149	4.97	173	0.4	66.7	26	12	No	No	No	372	4.67	1.56	1	3.19	37	57
NO.29	AF group		non-recurrent group	paroxysmal AF		M	73	101	4.7	210	13.93	188.6	13	9	No	No	No	488	4.8	0.81	1.22	2.92	40	47
NO.30	AF group		non-recurrent group	persistent AF		F	77	117	6	121	2.76	67	9	11	Yes	No	No	258	6.51	1.56	1.85	1.67	43	63
NO.31	AF group		non-recurrent group	paroxysmal AF		F	62	121	7	204	12.63	85.2	55	9	Yes	No	No	330	4.48	1.05	1.12	2.92	31	73
NO.32	AF group		non-recurrent group	paroxysmal AF		F	71	124	4.6	153	0.4	68.3	14	8	Yes	No	No	453	3.1	1.39	1.15	1.66	53	63
NO.33	AF group		non-recurrent group	paroxysmal AF		M	63	133	2.92	87	0.71	82	15	7	No	No	No	444	3.92	0.8	1.04	2.34	43	59
NO.34	AF group		non-recurrent group	paroxysmal AF		F	75	132	3.94	75	2.21	77.3	32	9	Yes	No	No	212	2.89	1.95	0.87	1.69	47	63
NO.35	AF group		non-recurrent group	paroxysmal AF		M	31	149	7.47	261	7.8	78.4	15	8	No	No	No	385	5.86	0.65	1.82	3.69	38	65
NO.36	AF group		non-recurrent group	paroxysmal AF		M	66	141	7.79	214	3.2	65.1	51	12	Yes	Yes	No	514	4.02	0.74	1	2.49	51	41
NO.37	AF group		non-recurrent group	paroxysmal AF		M	63	122	3.82	251	4.02	87	39	7	No	Yes	Yes	244	4.81	1.39	1.05	3.34	48	62
NO.38	AF group		non-recurrent group	paroxysmal AF		M	44	136	4.24	220	0.4	72.4	32	7	No	No	No	341	4.09	2.26	0.81	2.9	46	62
NO.39	AF group		non-recurrent group	persistent AF		M	72	136	6.93	192	0.58	81.2	18	7	No	No	No	403	5.01	1.04	1.08	3.14	42	75
NO.40	AF group		non-recurrent group	paroxysmal AF		M	60	144	4.88	149	0.4	69	29	13	No	Yes	No	238	4.53	0.54	1.38	2.81	47	71
NO.41	AF group		non-recurrent group	paroxysmal AF		F	47	138	7.12	194	0.69	47.1	13	14	No	No	No	533	4.87	0.5	1.38	3.22	53	54
NO.42	AF group		non-recurrent group	paroxysmal AF		M	52	153	6.07	165	0.4	71.7	15	12	No	No	No	313	5.54	1.15	1.57	3.34	40	63
NO.43	AF group		non-recurrent group	persistent AF		M	63	127	5.33	77	0.4	74.5	16	8	Yes	No	No	259	4.31	1.37	0.94	2.59	42	60
NO.44	AF group		non-recurrent group	persistent AF		M	75	123	4.43	96	0.4	88.2	24	3	Yes	Yes	Yes	409	2.8	1.03	0.93	1.39	47	65
NO.45	AF group		non-recurrent group	paroxysmal AF		M	66	139	7.84	161	2.81	178.6	14	11	Yes	No	No	552	6.58	2.27	1.11	4.72	42	53
NO.46	AF group		non-recurrent group	paroxysmal AF		F	61	154	6.68	187	1.4	73.9	15	23	Yes	No	Yes	293	7.72	8.34	1.2	4.44	42	49
NO.47	AF group		non-recurrent group	paroxysmal AF		M	73	127	4.72	130	0.4	73.9	32	8	No	No	No	347	4.1	0.48	1.37	2.22	45	64
NO.48	AF group		non-recurrent group	persistent AF		M	39	156	9.36	222	0.2	73.5	28	14	No	No	No	332	5.89	2.07	1.39	3.58	37	69
NO.49	AF group		non-recurrent group	persistent AF		M	50	142	3.32	186	1.32	93.6	117	11	Yes	No	No	451	3.86	1.44	1.01	2.23	40	66
NO.50	AF group		non-recurrent group	paroxysmal AF		M	72	152	4.06	140	0.62	54.4	17	9	Yes	No	No	398	4.19	1.91	0.76	2.89	51	65
NO.51	AF group		non-recurrent group	persistent AF		M	69	140	10.13	214	0.4	110	31	8	Yes	No	No	350	6.2	1.37	1.22	3.54	42	72
NO.52	AF group		non-recurrent group	paroxysmal AF		F	74	128	5.01	140	2.66	36.7	71	6	Yes	No	No	413	5.49	0.93	1.46	3.56	47	73
NO.53	AF group		non-recurrent group	persistent AF		M	73	118	9.21	209	2.79	64.3	32	15	No	No	No	338	3.65	2.21	1.43	2.54	54	55
NO.54	AF group		non-recurrent group	persistent AF		M	83	161	5.58	102	21.42	82.2	37	12	Yes	No	No	412	2.58	1.04	0.98	1.49	62	52
NO.55	AF group		non-recurrent group	paroxysmal AF		M	72	137	6.05	125	0.4	73.8	21	9	Yes	No	No	314	3.35	2.93	0.97	1.69	45	62
NO.56	AF group		non-recurrent group	paroxysmal AF		F	51	141	7.9	289	0.93	68.6	19	19	No	No	No	408	5.26	0.73	1.65	3.01	46	57
NO.57	AF group		recurrent group	persistent AF		F	80	121	8.28	250	0.32	66.1	10	7	No	No	Yes	362	4.42	0.83	1.44	2.42	45	60
NO.58	AF group		recurrent group	paroxysmal AF		M	52	164	8.04	279	1.04	84.4	32	12	Yes	No	No	297	7.21	1.68	1.58	5.03	52	60
NO.59	AF group		recurrent group	paroxysmal AF		F	69	134	4.93	147	7.62	90.5	15	16	No	No	No	290	4.04	0.7	1.1	2.55	48	70
NO.60	AF group		recurrent group	persistent AF		M	76	106	5.96	156	11.03	133	10	6	Yes	No	No	901	3	0.73	0.92	1.92	47	54
NO.61	AF group		recurrent group	persistent AF		F	43	128	4.05	206	0.4	60.5	20	10	No	No	No	317	4.11	0.67	1.47	2.24	33	78
NO.62	AF group		recurrent group	persistent AF		F	63	144	8.37	322	0.4	56.8	35	12	Yes	No	Yes	202	5.19	1.21	1.17	3.56	42	62
NO.63	AF group		recurrent group	persistent AF		M	67	127	3.18	149	2.78	78.6	57	8	Yes	No	No	470	4.51	1.26	1.36	2.74	53	52

## Sheet: PCR results for miR-15a-5p
Serial number	RNA concentration	Serial number	RNA concentration	Serial number	RNA concentration	Serial number	RNA concentration	Serial number	RNA concentration	Serial number	RNA concentration	Serial number	RNA concentration
NO.1	12.2	NO.11	15.2	NO.21	28.1	NO.31	18.4	NO.41	87.3	NO.51	33.7	NO.61	83
NO.2	9.4	NO.12	13.4	NO.22	9.6	NO.32	28.8	NO.42	13.2	NO.52	37.6	NO.62	150
NO.3	207.5	NO.13	15.9	NO.23	14	NO.33	27.5	NO.43	11.5	NO.53	16.8	NO.63	91.5
NO.4	34.5	NO.14	12.1	NO.24	13.9	NO.34	16.7	NO.44	8.6	NO.54	55.4
NO.5	12.6	NO.15	11.8	NO.25	11.4	NO.35	19.4	NO.45	14.5	NO.55	25.8
NO.6	17.3	NO.16	25.6	NO.26	20.5	NO.36	25.3	NO.46	22.7	NO.56	38.7
NO.7	20.8	NO.17	88.4	NO.27	12.1	NO.37	21.5	NO.47	24.9	NO.57	23.4
NO.8	18.3	NO.18	13.2	NO.28	18.6	NO.38	17.9	NO.48	35.6	NO.58	57.7
NO.9	14.9	NO.19	19.6	NO.29	14.3	NO.39	15.6	NO.49	28.5	NO.59	22
NO.10	14	NO.20	22.5	NO.30	11.9	NO.40	18.2	NO.50	24.2	NO.60	11
Serial number	Experimental data（CT value)		ΔCT		Serial number	Experimental data（CT value)		ΔCT		Serial number	Experimental data（CT value)		ΔCT		Serial number	Experimental data（CT value)		ΔCT			Serial number	Experimental data（CT value)		ΔCT			Serial number	Experimental data		ΔCT
No.1	mIRNA-15a-5p	20.09	2.02		No.5	mIRNA-15a-5p	20.24	1.665		No.9	mIRNA-15a-5p	19.02	2.51		No.13	mIRNA-15a-5p	19.86	2.705			No.15	mIRNA-15a-5p	24.33	2.675			No.18	mIRNA-15a-5p	19.6	3.755
		19.48					20.38					18.38					19.94						23.36						19.3
	U6	17.66				U6	18.66				U6	16.66				U6	17.66					U6	21.66					U6	15.66
		17.87					18.63					15.72					16.73						20.68						15.73
No.2	mIRNA-15a-5p	18.33	2.18		No.6	mIRNA-15a-5p	23.29	2.92		No.10	mIRNA-15a-5p	20.16	2.875		No.14	mIRNA-15a-5p	19.73	2.35			No.16	mIRNA-15a-5p	18.69	2.315			No.19	mIRNA-15a-5p	22.1	4
		18.55					23.12					20.17					19.46						18.45						22.3
	U6	16.27				U6	20.27				U6	17.27				U6	17.27					U6	16.27					U6	18.27
		16.25					20.3					17.31					17.22						16.24						18.13
No.3	mIRNA-15a-5p	21.5	2.325		No.7	mIRNA-15a-5p	21.24	2.625		No.11	mIRNA-15a-5p	21.43	2.78		N0.33	mIRNA-15a-5p	20.73	2.74			No.17	mIRNA-15a-5p	21.8	2.595			No.20	mIRNA-15a-5p	22.51	3.11
		21.38					21.29					21.68					20.66						21.39						22.28
	U6	19.11				U6	18.29				U6	18.64				U6	17.99					U6	19.01					U6	19.24
		19.12					18.99					18.91					17.92						18.99						19.33
No.4	mIRNA-15a-5p	15.93	2.54		No.8	mIRNA-15a-5p	25.49	2.95		No.12	mIRNA-15a-5p	20.34	3.93		N0.34	mIRNA-15a-5p	20.82	2.02			No.41	mIRNA-15a-5p	23.76	2.875			No.50	mIRNA-15a-5p	24.54	2.97
		15.98					25.46					20.37					20.05						22.86						24.23
	U6	13.42				U6	22.42				U6	16.42				U6	18.42					U6	20.42					U6	21.42
		13.41					22.63					16.43					18.41						20.45						21.41
No.21	mIRNA-15a-5p	20.84	2.44		N0.25	mIRNA-15a-5p	20.11	2.755		No.29	mIRNA-15a-5p	19.48	2.31		N0.35	mIRNA-15a-5p	21.28	2.905			No.42	mIRNA-15a-5p	23.53	2.835			No.51	mIRNA-15a-5p	23.87	2.255
		20.65					20.07					19.76					21.15						22.77						23.29
	U6	18.32				U6	17.32				U6	17.32				U6	18.32					U6	20.32					U6	21.32
		18.29					17.35					17.3					18.3						20.31						21.33
No.22	mIRNA-15a-5p	21.05	2.96		N0.26	mIRNA-15a-5p	21.16	2.545		No.30	mIRNA-15a-5p	19.63	2.205		N0.36	mIRNA-15a-5p	20.7	2.06			No.43	mIRNA-15a-5p	24.59	2.075			No.52	mIRNA-15a-5p	22.7	2.545
		21.67					20.84					19.66					20.34						24.47						21.31
	U6	18.47				U6	18.47				U6	17.47				U6	18.47					U6	22.47					U6	19.47
		18.33					18.44					17.41					18.45						22.44						19.45
No.23	mIRNA-15a-5p	22.56	2.205		N0.27	mIRNA-15a-5p	20.03	2.58		No.31	mIRNA-15a-5p	21.73	2.78		N0.37	mIRNA-15a-5p	18.32	3.005			No.44	mIRNA-15a-5p	14.79	2.23			No.53	mIRNA-15a-5p	25.1	2.185
		23.18					20.38					21.29					17.15						13.12						24.73
	U6	20.74				U6	17.62				U6	18.74				U6	14.74					U6	11.74					U6	22.74
		20.59					17.63					18.72					14.72						11.71						22.72
No.24	mIRNA-15a-5p	19.75	1.995		N0.28	mIRNA-15a-5p	21.95	2.175		No.32	mIRNA-15a-5p	24.37	2.705		N0.38	mIRNA-15a-5p	18.88	2.64			No.45	mIRNA-15a-5p	16.87	2.18			No.54	mIRNA-15a-5p	26.9	2.155
		19.84					21.54					24.18					19.55						16.63						26.55
	U6	17.59				U6	19.59				U6	21.59				U6	16.59					U6	14.59					U6	24.59
		18.01					19.55					21.55					16.56						14.55						24.55
NO.57	mIRNA-15a-5p	18.51	2.115		No.40	mIRNA-15a-5p	20.62	2.305		No.47	mIRNA-15a-5p	22.22	2.545		N0.39	mIRNA-15a-5p	11.81	2.01			No.46	mIRNA-15a-5p	20.23	2.57			No.55	mIRNA-15a-5p	22.35	2.2
		18.37					21.45					22.33					12.3						20.36						22.12
	U6	16.34				U6	18.74				U6	19.74				U6	10.06					U6	17.72					U6	20.02
		16.31					18.72					19.72					10.03						17.73						20.05
NO.58	mIRNA-15a-5p	19.92	2.215		No.59	mIRNA-15a-5p	23.3	2.335		No.60	mIRNA-15a-5p	19.63	2.035		No.49	mIRNA-15a-5p	22.27	2.155			No.48	mIRNA-15a-5p	22.75	2.265			No.56	mIRNA-15a-5p	23.47	2.255
		19.97					23.23					19.56					22.1						22.04						23.89
	U6	17.74				U6	20.94				U6	17.57				U6	20.04					U6	20.14					U6	21.44
		17.72					20.92					17.55					20.02						20.12						21.41
															No.61	mIRNA-15a-5p	22.42	1.79			No.62	mIRNA-15a-5p	20.39	1.995			No.63	mIRNA-15a-5p	21.24	2.065
																	22.26						20.45						21.29
																U6	20.54					U6	18.43					U6	19.1
																	20.56						18.42						19.3
	Relative expression level of mIRNA-15a-5p								Relative expression level of mIRNA-15a-5p（2^(-ΔΔCT)）
	ΔCT	Average value of ΔCT		ΔΔCT	2^(-ΔΔCT)		Control group	non-recurrent group	recurrent group	Control group	AF group	Control group	paroxysmal AF	persistent AF	总RNA concentration
No.1	2.02	2.74125		-0.72125	1.64861		1.64861	1.23221	1.54355	1.64861	1.23221	1.64861	1.23221	1.4502	12.2
No.2	2.18			-0.56125	1.47555		1.47555	0.85931	1.44018	1.47555	0.85931	1.47555	0.85931	1.67743	9.4
No.3	2.325			-0.41625	1.33445		1.33445	1.4502	1.32524	1.33445	1.4502	1.33445	0.990515	1.4502	207.5
No.4	2.54			-0.20125	1.14969		1.14969	1.67743	1.63156	1.14969	1.67743	1.14969	1.14572	1.66008	34.5
No.5	1.665			-1.07625	2.10855		2.10855	0.990515	1.93355	2.10855	0.990515	2.10855	1.11826	1.58694	12.6
No.6	2.92			0.17875	0.883468		0.883468	1.14572	1.67743	0.883468	1.14572	0.883468	1.48067	1.42528	17.3
No.7	2.625			-0.11625	1.08391		1.08391	1.11826	1.59798	1.08391	1.11826	1.08391	1.3484	1.39112	20.8
No.8	2.95			0.20875	0.865287		0.865287	1.48067		0.865287	1.48067	0.865287	0.973498	1.50134	18.3
No.9	2.51			-0.23125	1.17385		1.17385	1.3484		1.17385	1.3484	1.17385	1.02544	1.4008	14.9
No.10	2.875			0.13375	0.911459		0.911459	1.4502		0.911459	1.4502	0.911459	1.00087	1.47044	14
No.11	2.78			0.03875	0.973498		0.973498	0.973498		0.973498	0.973498	0.973498	1.64861	1.50134	15.2
No.12	3.93			1.18875	0.438683		0.438683	1.02544		0.438683	1.02544	0.438683	0.892702	1.54355	13.4
No.13	2.705			-0.03625	1.02544		1.02544	1.00087		1.02544	1.00087	1.02544	1.60353	1.63156	15.9
No.14	2.35			-0.39125	1.31153		1.31153	1.64861		1.31153	1.64861	1.31153	0.83292	1.93355	12.1
No.15	2.675			-0.06625	1.04699		1.04699	0.892702		1.04699	0.892702	1.04699	1.0727	1.67743	11.8
No.16	2.315			-0.42625	1.34374		1.34374	1.60353		1.34374	1.60353	1.34374	1.35308	1.59798	25.6
No.17	2.595			-0.14625	1.10669		1.10669	0.83292		1.10669	0.83292	1.10669	0.911459		88.4
No.18	3.755			1.01375	0.495257		0.495257	1.0727		0.495257	1.0727	0.495257	0.937084		13.2
No.19	4			1.25875	0.417906		0.417906	1.66008		0.417906	1.66008	0.417906	1.47555		19.6
No.20	3.11			0.36875	0.774453		0.774453	1.35308		0.774453	1.35308	0.774453	1.12603		22.5
								0.911459			0.911459		1.14572		28.1
No.21	2.44	paroxysmal AF		-0.30125	1.23221			0.937084			0.937084		0.853374		9.6
No.22	2.96	paroxysmal AF		0.21875	0.85931			1.58694			1.58694		1.14572		14
No.23	2.205	persistent AF		-0.53625	1.4502			1.42528			1.42528		1.45523		13.9
No.24	1.995	persistent AF		-0.74625	1.67743			1.47555			1.47555		1.4008		11.4
No.25	2.755	paroxysmal AF		0.01375	0.990515			1.12603			1.12603		1.44018		20.5
No.26	2.545	paroxysmal AF		-0.19625	1.14572			1.14572			1.14572		1.32524		12.1
No.27	2.58	paroxysmal AF		-0.16125	1.11826			1.39112			1.39112				18.6
No.28	2.175	paroxysmal AF		-0.56625	1.48067			1.50134			1.50134				14.3
No.29	2.31	paroxysmal AF		-0.43125	1.3484			0.853374			0.853374				11.9
No.30	2.205	persistent AF		-0.53625	1.4502			1.4008			1.4008				18.4
No.31	2.78	paroxysmal AF		0.03875	0.973498			1.14572			1.14572				28.8
No.32	2.705	paroxysmal AF		-0.03625	1.02544			1.47044			1.47044				27.5
No.33	2.74	paroxysmal AF		-0.00125	1.00087			1.50134			1.50134				16.7
No.34	2.02	paroxysmal AF		-0.72125	1.64861			1.45523			1.45523				19.4
No.35	2.905	paroxysmal AF		0.16375	0.892702			1.4008			1.4008				25.3
No.36	2.06	paroxysmal AF		-0.68125	1.60353						1.54355				21.5
No.37	3.005	paroxysmal AF		0.26375	0.83292						1.44018				17.9
No.38	2.64	paroxysmal AF		-0.10125	1.0727						1.32524				15.6
No.39	2.01	persistent AF		-0.73125	1.66008						1.63156				18.2
No.40	2.305	paroxysmal AF		-0.43625	1.35308						1.93355				87.3
No.41	2.875	paroxysmal AF		0.13375	0.911459						1.67743				13.2
No.42	2.835	paroxysmal AF		0.09375	0.937084						1.59798				11.5
No.43	2.075	persistent AF		-0.66625	1.58694										8.6
No.44	2.23	persistent AF		-0.51125	1.42528										14.5
No.45	2.18	paroxysmal AF		-0.56125	1.47555										22.7
No.46	2.57	paroxysmal AF		-0.17125	1.12603										24.9
No.47	2.545	paroxysmal AF		-0.19625	1.14572										35.6
No.48	2.265	persistent AF		-0.47625	1.39112										28.5
No.49	2.155	persistent AF		-0.58625	1.50134										24.2
No.50	2.97	paroxysmal AF		0.22875	0.853374										33.7
No.51	2.255	persistent AF		-0.48625	1.4008										37.6
No.52	2.545	paroxysmal AF		-0.19625	1.14572										16.8
No.53	2.185	persistent AF		-0.55625	1.47044										55.4
No.54	2.155	persistent AF		-0.58625	1.50134										25.8
No.55	2.2	paroxysmal AF		-0.54125	1.45523										38.7
No.56	2.255	paroxysmal AF		-0.48625	1.4008										23.4
															57.7
No.57	2.115	persistent AF		-0.62625	1.54355										22
No.58	2.215	paroxysmal AF		-0.52625	1.44018										11
No.59	2.335	paroxysmal AF		-0.40625	1.32524										83
No.60	2.035	persistent AF		-0.70625	1.63156										150
No.61	1.79	persistent AF		-0.95125	1.93355										91.5
No.62	1.995	persistent AF		-0.74625	1.67743
No.63	2.065	persistent AF		-0.67625	1.59798

## Sheet: MMP9 results
	1	2	3	4	5	6	7	8	9	10	11	12		Standard OD value	Standard concentration(ng/ml)
A	3.497	1.063	0.656	1.199	1.527	1.412	1.243	1.176	1.53	0	0	0		0.015	0
B	1.983	1.004	1.189	1.053	1.272	1.313	1.476	0.696	1.559	0	0	0		0.044	0.156
C	1.125	0.962	1.137	1.163	1.284	1.061	1.214	0.747	1.595	0	0	0		0.122	0.312
D	0.584	1.017	0.534	1.222	1.053	1.193	0.929	0.783	1.591	0	0	0		0.272	0.625
E	0.272	0.802	0.557	1.386	1.342	1.195	1.209	1.205	1.589	0	0	0		0.584	1.25
F	0.122	1.036	1.096	1.09	1.252	0.893	0.963	1.569	1.53	0	0	0		1.125	2.5
G	0.044	0.716	1.188	1.242	1.263	0.895	1.131	1.459	1.625	0	0	0		1.983	5
H	0.015	1.005	1.026	1.283	1.326	1.502	1.191	1.189	0	0	0	0		3.497	10
												MMP9 concentration(ng/ml)
Serial number	OD value	concentration(ng/ml)		Serial number	OD value	concentration(ng/ml)		Control group	non-recurrent group	recurrent group	Control group	AF group
No.1	1.063	2.41693		No.36	1.193	2.74747		2.41693	3.25383	3.6438	2.41693	3.25383
No.2	1.004	2.26972		No.37	1.195	2.75262		2.26972	2.48489	3.7236	2.26972	2.48489
No.3	0.962	2.16598		No.38	0.893	1.99748		2.16598	2.87426	3.82324	2.16598	2.87426
No.4	1.017	2.30201		No.39	0.895	2.00233		2.30201	2.98127	3.81213	2.30201	2.98127
No.5	0.802	1.77891		No.40	1.502	3.56716		1.77891	3.63557	3.80659	1.77891	3.63557
No.6	1.036	2.34935		No.41	1.243	2.87686		2.34935	2.95248	3.6438	2.34935	2.95248
No.7	0.716	1.57616		No.42	1.476	3.49634		1.57616	2.98389	3.90677	1.57616	2.98389
No.8	1.005	2.2722		No.43	1.214	2.80166		2.2722	2.39186		2.2722	2.39186
No.9	0.656	1.43691		No.44	0.929	2.0851		1.43691	3.13675		1.43691	3.13675
No.10	1.189	2.73718		No.45	1.209	2.78874		2.73718	2.90028		2.73718	2.90028
No.11	1.137	2.60405		No.46	0.963	2.16844		2.60405	2.92897		2.60405	2.92897
No.12	0.534	1.15933		No.47	1.131	2.58877		1.15933	3.09441		1.15933	3.09441
No.13	0.557	1.21109		No.48	1.191	2.74232		1.21109	3.32347		1.21109	3.32347
No.14	1.096	2.50004		No.49	1.176	2.70377		2.50004	3.06011		2.50004	3.06011
No.15	1.188	2.7346		No.50	0.696	1.52954		2.7346	2.41192		2.7346	2.41192
No.16	1.026	2.32441		No.51	0.747	1.64882		2.32441	2.74747		2.32441	2.74747
No.17	1.199	2.76293		No.52	0.783	1.7338		2.76293	2.75262		2.76293	2.75262
No.18	1.053	2.39186		No.53	1.205	2.77841		2.39186	1.99748		2.39186	1.99748
No.19	1.163	2.67044		No.54	1.569	3.75121		2.67044	2.00233		2.67044	2.00233
No.20	1.222	2.82237		No.55	1.459	3.45022		2.82237	3.56716		2.82237	3.56716
No.21	1.386	3.25383		No.56	1.189	2.73718			2.87686			2.87686
No.22	1.09	2.48489		No.57	1.53	3.6438			3.49634			3.49634
No.23	1.242	2.87426		No.58	1.559	3.7236			2.80166			2.80166
No.24	1.283	2.98127		No.59	1.595	3.82324			2.0851			2.0851
No.25	1.527	3.63557		No.60	1.591	3.81213			2.78874			2.78874
No.26	1.272	2.95248		No.61	1.589	3.80659			2.16844			2.16844
No.27	1.284	2.98389		No.62	1.53	3.6438			2.58877			2.58877
No.28	1.053	2.39186		No.63	1.625	3.90677			2.74232			2.74232
No.29	1.342	3.13675									2.70377			2.70377
No.30	1.252	2.90028									1.52954			1.52954
No.31	1.263	2.92897									1.64882			1.64882
No.32	1.326	3.09441									1.7338			1.7338
No.33	1.412	3.32347									2.77841			2.77841
No.34	1.313	3.06011									3.75121			3.75121
No.35	1.061	2.41192									3.45022			3.45022
													2.73718			2.73718
													3.6438			3.6438
													3.7236			3.7236
													3.82324			3.82324
													3.81213			3.81213
													3.80659			3.80659
													3.6438			3.6438
													3.90677			3.90677

## Sheet: PICP results
1	2	3	4	5	6	7	8	9	10	11	12		Standard OD value	Standard concentration(ng/ml)	Standard OD value	Standard concentration(ng/ml)
3.165	2.352	2.046	2.059	2.147	2.038	1.974	1.999	2.51	0	0	0		0.023	0	0.323	0
1.336	2.295	1.944	1.951	2.313	2.196	2.115	2.39	2.51	0	0	0		0.153	0.0625	0.553	0.0625
0.828	2.288	1.935	1.959	2.367	2.379	2.333	2.116	2.35	0	0	0		0.281	0.125	0.881	0.125
0.565	1.975	2.135	2.106	2.14	2.174	2.045	2.086	2.213	0	0	0		0.402	0.25	1.402	0.25
0.402	1.971	1.933	1.986	2.248	2.157	2.257	2.044	2.381	0	0	0		0.565	0.5	1.565	0.5
0.281	1.963	1.93	2.102	2.274	2.267	2.215	2.314	2.365	0	0	0		0.828	1	1.828	1
0.153	2.149	2.128	2.416	2.278	1.979	2.117	1.95	2.43	0	0	0		1.336	2	2.336	2
0.023	1.959	2.018	2.15	2.008	2.005	2.017	2.006	0	0	0	0		3.165	4	3.165	4
												PICP concentration (ng/ml)
Serial number	OD value	concentration(ng/ml)		Serial number	OD value	concentration(ng/ml)		Control group	non-recurrent group	recurrent group	Control group	AF group
No.1	2.352	2.07219		No.36	2.174	1.63233		2.07219	1.21315	2.48325	2.07219	1.21315
No.2	2.295	1.9278		No.37	2.157	1.59225		1.9278	1.46537	2.48325	1.9278	1.46537
No.3	2.288	1.91027		No.38	2.267	1.85797		1.91027	2.23724	2.06708	1.91027	2.23724
No.4	1.975	1.1904		No.39	1.979	1.19865		1.1904	1.57586	1.72569	1.1904	1.57586
No.5	1.971	1.18219		No.40	2.005	1.25293		1.18219	1.56886	2.14665	1.18219	1.56886
No.6	1.963	1.16584		No.41	1.974	1.18835		1.16584	1.97309	2.10549	1.16584	1.97309
No.7	2.149	1.57353		No.42	2.115	1.49496		1.57353	2.11063	2.27367	1.57353	2.11063
No.8	1.959	1.1577		No.43	2.333	2.02375		1.1577	1.55257		1.1577	1.55257
No.9	2.046	1.34086		No.44	2.045	1.33869		1.34086	1.81105		1.34086	1.81105
No.10	1.944	1.12746		No.45	2.257	1.83323		1.12746	1.87535		1.12746	1.87535
No.11	1.935	1.10952		No.46	2.215	1.73053		1.10952	1.88531		1.10952	1.88531
No.12	2.135	1.54098		No.47	2.117	1.49954		1.54098	1.25927		1.54098	1.25927
No.13	1.933	1.10555		No.48	2.017	1.27837		1.10555	1.32349		1.10555	1.32349
No.14	1.93	1.09961		No.49	1.999	1.2403		1.09961	1.68476		1.09961	1.68476
No.15	2.128	1.52481		No.50	2.39	2.16987		1.52481	2.14149		1.52481	2.14149
No.16	2.018	1.28051		No.51	2.116	1.49725		1.28051	1.63233		1.28051	1.63233
No.17	2.059	1.36933		No.52	2.086	1.4293		1.36933	1.59225		1.36933	1.59225
No.18	1.951	1.14152		No.53	2.044	1.33651		1.14152	1.85797		1.14152	1.85797
No.19	1.959	1.1577		No.54	2.314	1.97561		1.1577	1.19865		1.1577	1.19865
No.20	2.106	1.47445		No.55	1.95	1.13951		1.47445	1.25293		1.47445	1.25293
No.21	1.986	1.21315		No.56	2.006	1.25504			1.18835			1.18835
No.22	2.102	1.46537		No.57	2.51	2.48325			1.49496			1.49496
No.23	2.416	2.23724		No.58	2.51	2.48325			2.02375			2.02375
No.24	2.15	1.57586		No.59	2.35	2.06708			1.33869			1.33869
No.25	2.147	1.56886		No.60	2.213	1.72569			1.83323			1.83323
No.26	2.313	1.97309		No.61	2.381	2.14665			1.73053			1.73053
No.27	2.367	2.11063		No.62	2.365	2.10549			1.49954			1.49954
No.28	2.14	1.55257		No.63	2.43	2.27367			1.27837			1.27837
No.29	2.248	1.81105									1.2403			1.2403
No.30	2.274	1.87535									2.16987			2.16987
No.31	2.278	1.88531									1.49725			1.49725
No.32	2.008	1.25927									1.4293			1.4293
No.33	2.038	1.32349									1.33651			1.33651
No.34	2.196	1.68476									1.97561			1.97561
No.35	2.379	2.14149									1.13951			1.13951
													1.25504			1.25504
																2.48325
																2.48325
																2.06708
																1.72569
																2.14665
																2.10549
																2.27367

## Sheet: PIIINP results
1	2	3	4	5	6	7	8	9	10	11	12		Standard OD value	Standard concentration(ng/ml)
4.46	3.368	3.398	2.898	3.42	3.718	3.076	3.063	3.816	0	0	0		1.088	0
3.945	3.377	2.924	3.463	3.406	3.461	3.657	3.509	3.864	0	0	0		1.422	0.156
3.102	3.372	3.325	3.466	3.532	3.675	3.336	3.347	3.847	0	0	0		1.905	0.312
2.386	3.328	3.364	3.438	3.364	3.804	3.697	3.712	3.86	0	0	0		2.052	0.635
1.052	3.377	3.283	3.332	3.214	3.04	3.697	3.619	3.846	0	0	0		2.386	1.25
1.905	3.34	3.457	3.597	3.256	3.737	3.481	3.506	3.819	0	0	0		3.102	2.5
1.422	3.055	3.208	3.291	3.319	3.335	3.051	3.42	3.944	0	0	0		3.945	5
1.088	3.377	3.351	3.647	3.589	3.187	3.409	3.438	0	0	0	0		4.46	10
												PIIINP concentration (ng/ml)
Serial number	OD value	concentration(ng/ml)		Serial number	OD value	concentration(ng/ml)		Control group	non-recurrent group	recurrent group	Control group	AF group
No.1	3.368	3.05652		No.36	3.804	4.3168		3.05652	2.97947	4.36597	3.05652	2.97947
No.2	3.377	3.07612		No.37	3.04	2.40131		3.07612	3.61784	4.57466	3.07612	3.61784
No.3	3.372	3.06522		No.38	3.737	4.06199		3.06522	2.89402	4.49847	3.06522	2.89402
No.4	3.328	2.97104		No.39	3.335	2.98582		2.97104	3.76478	4.5565	2.97104	3.76478
No.5	3.377	3.07612		No.40	3.187	2.68532		3.07612	3.17191	4.49407	3.07612	3.17191
No.6	3.34	2.99642		No.41	3.076	2.47021		2.99642	3.14031	4.37844	2.99642	3.14031
No.7	3.055	2.42998		No.42	3.657	3.7956		2.42998	3.44239	4.97069	2.42998	3.44239
No.8	3.377	3.07612		No.43	3.336	2.98793		3.07612	3.04786		3.07612	3.04786
No.9	3.398	3.12244		No.44	3.697	3.92416		3.12244	2.73862		3.12244	2.73862
No.10	2.924	2.18036		No.45	3.697	3.92416		2.18036	2.82267		2.18036	2.82267
No.11	3.325	2.96472		No.46	3.481	3.31492		2.96472	2.95213		2.96472	2.95213
No.12	3.364	3.04786		No.47	3.051	2.42233		3.04786	3.59535		3.04786	3.59535
No.13	3.283	2.87759		No.48	3.409	3.14705		2.87759	3.9953		2.87759	3.9953
No.14	3.457	3.25754		No.49	3.063	2.4453		3.25754	3.267		3.25754	3.267
No.15	3.208	2.72673		No.50	3.509	3.38391		2.72673	3.85238		2.72673	3.85238
No.16	3.351	3.01988		No.51	3.347	3.01133		3.01988	4.3168		3.01988	4.3168
No.17	2.898	2.13091		No.52	3.712	3.9747		2.13091	2.40131		2.13091	2.40131
No.18	3.463	3.27174		No.53	3.619	3.68108		3.27174	4.06199		3.27174	4.06199
No.19	3.466	3.27888		No.54	3.506	3.3764		3.27888	2.98582		3.27888	2.98582
No.20	3.438	3.21316		No.55	3.42	3.17191		3.21316	2.68532		3.21316	2.68532
No.21	3.332	2.97947		No.56	3.438	3.21316			2.47021			2.47021
No.22	3.597	3.61784		No.57	3.816	4.36597			3.7956			3.7956
No.23	3.291	2.89402		No.58	3.864	4.57466			2.98793			2.98793
No.24	3.647	3.76478		No.59	3.847	4.49847			3.92416			3.92416
No.25	3.42	3.17191		No.60	3.86	4.5565			3.92416			3.92416
No.26	3.406	3.14031		No.61	3.846	4.49407			3.31492			3.31492
No.27	3.532	3.44239		No.62	3.819	4.37844			2.42233			2.42233
No.28	3.364	3.04786		No.63	3.944	4.97069			3.14705			3.14705
No.29	3.214	2.73862									2.4453			2.4453
No.30	3.256	2.82267									3.38391			3.38391
No.31	3.319	2.95213									3.01133			3.01133
No.32	3.589	3.59535									3.9747			3.9747
No.33	3.718	3.9953									3.68108			3.68108
No.34	3.461	3.267									3.3764			3.3764
No.35	3.675	3.85238									3.17191			3.17191
													3.21316			3.21316
																4.36597
																4.57466
																4.49847
																4.5565
																4.49407
																4.37844
																4.97069

## Sheet: sST2 results
1	2	3	4	5	6	7	8	9	10	11	12		Standard OD value	Standard concentration(ng/ml)
3.723	1.635	1.621	1.554	1.846	1.866	1.626	1.766	1.913	0	0	0		0.636	0
3.024	1.616	1.472	1.62	1.794	1.631	1.551	1.586	1.924	0	0	0		1.24	3.5
2.241	1.627	1.595	1.839	1.732	1.534	1.683	1.605	1.835	0	0	0		1.767	7
1.767	1.611	1.64	1.809	1.656	1.631	1.564	1.513	1.807	0	0	0		2.241	14
1.24	1.602	1.61	1.889	1.809	1.514	1.573	1.574	1.952	0	0	0		3.024	28
0.636	1.646	1.596	1.869	1.679	1.558	1.789	1.87	0	0	0	0		3.723	56
1.528	1.639	1.588	1.809	1.633	1.699	1.814	1.894	0	0	0	0
1.566	1.585	1.629	1.768	1.777	1.581	1.751	1.913	0	0	0	0
												sST2 concentration (ng/ml)
Serial number	OD	concentration(ng/ml)		Serial number	OD	concentration(ng/ml)		Control group	non-recurrent group	recurrent group	Control group	AF group
No.1	1.528	3.82969	19.1484	No.36	1.631	4.78935	23.9468	19.1484	35.752	39.3466	19.1484	19.1484
No.2	1.566	4.16759	20.8379	No.37	1.534	3.88179	19.4089	20.8379	33.8747	40.6344	20.8379	33.8747
No.3	1.635	4.82942	24.1471	No.38	1.631	4.78935	23.9468	24.1471	39.0117	40.6344	24.1471	39.0117
No.4	1.616	4.64096	23.2048	No.39	1.514	3.70996	18.5498	23.2048	37.6882	41.3907	23.2048	37.6882
No.5	1.627	4.74949	23.7475	No.40	1.558	4.09488	20.4744	23.7475	33.8747	35.4983	23.7475	33.8747
No.6	1.611	4.59215	22.9608	No.41	1.699	5.49897	27.4948	22.9608	31.4042	33.7516	22.9608	31.4042
No.7	1.602	4.50512	22.5256	No.42	1.581	4.30616	21.5308	22.5256	36.1985	43.3516	22.5256	36.1985
No.8	1.646	4.94069	24.7034	No.43	1.626	4.73956	23.6978	24.7034	32.9581		24.7034	32.9581
No.9	1.639	4.8697	24.3485	No.44	1.551	4.03195	20.1597	24.3485	29.3257		24.3485	29.3257
No.10	1.585	4.34362	21.7181	No.45	1.683	5.32656	26.6328	21.7181	25.2161		21.7181	25.2161
No.11	1.621	4.6901	23.4505	No.46	1.564	4.14933	20.7467	23.4505	33.8747		23.4505	33.8747
No.12	1.472	3.36617	16.8308	No.47	1.573	4.23189	21.1594	16.8308	26.4199		16.8308	26.4199
No.13	1.595	4.43816	22.1908	No.48	1.789	6.53117	32.6559	22.1908	24.0468		22.1908	24.0468
No.14	1.64	4.8798	24.399	No.49	1.814	6.8367	34.1835	24.399	31.9371		24.399	31.9371
No.15	1.61	4.58243	22.9122	No.50	1.751	6.08243	30.4121	22.9122	37.4919		22.9122	37.4919
No.16	1.596	4.44769	22.2384	No.51	1.766	6.25731	31.2865	22.2384	23.9468		22.2384	23.9468
No.17	1.588	4.37184	21.8592	No.52	1.586	4.35301	21.7651	21.8592	19.4089		21.8592	19.4089
No.18	1.629	4.7694	23.847	No.53	1.605	4.53401	22.6701	23.847	23.9468		23.847	23.9468
No.19	1.554	4.05884	20.2942	No.54	1.513	3.70151	18.5075	20.2942	18.5498		20.2942	18.5498
No.20	1.62	4.68025	23.4012	No.55	1.574	4.24113	21.2056	23.4012	20.4744		23.4012	20.4744
No.21	1.839	7.1504	35.752	No.56	1.87	7.55074	37.7537		27.4948			27.4948
No.22	1.809	6.77494	33.8747	No.57	1.894	7.86932	39.3466		21.5308			21.5308
No.23	1.889	7.80233	39.0117	No.58	1.913	8.12687	40.6344		23.6978			23.6978			2
No.24	1.869	7.53763	37.6882	No.59	1.913	8.12687	40.6344		20.1597			20.1597
No.25	1.809	6.77494	33.8747	No.60	1.924	8.27814	41.3907		26.6328			26.6328
No.26	1.768	6.28085	31.4042	No.61	1.835	7.09966	35.4983		20.7467			20.7467
No.27	1.846	7.2397	36.1985	No.62	1.807	6.75033	33.7516		21.1594			21.1594
No.28	1.794	6.59162	32.9581	No.63	1.952	8.67032	43.3516		32.6559			32.6559
No.29	1.732	5.86514	29.3257								34.1835			34.1835
No.30	1.656	5.04321	25.2161								30.4121			30.4121
No.31	1.809	6.77494	33.8747								31.2865			31.2865
No.32	1.679	5.28398	26.4199								21.7651			21.7651
No.33	1.633	4.80936	24.0468								22.6701			22.6701
No.34	1.777	6.38742	31.9371								18.5075			18.5075
No.35	1.866	7.49838	37.4919								21.2056			21.2056
													37.7537			37.7537
																39.3466
																40.6344
																40.6344
																41.3907
																35.4983
																33.7516
																43.3516
